# Supplementary material for: Assessment of Antifungal Efficacy and Release Behavior of Fungicide-Loaded Chitosan-Carrageenan Nanoparticles against Phytopathogenic Fungi
Source: MDPI journal article supplement (doi:10.3390/polym14010041), 2021-12-23
Supplement: s1 [file s1]

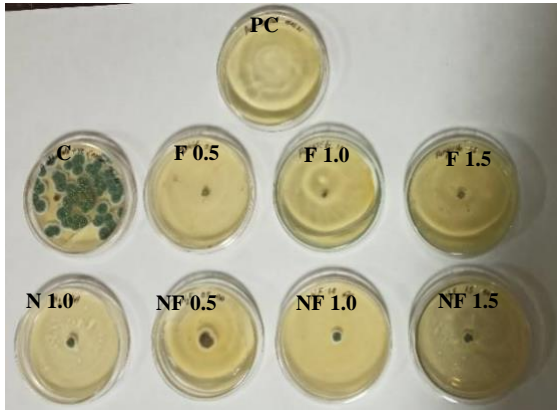

(a)

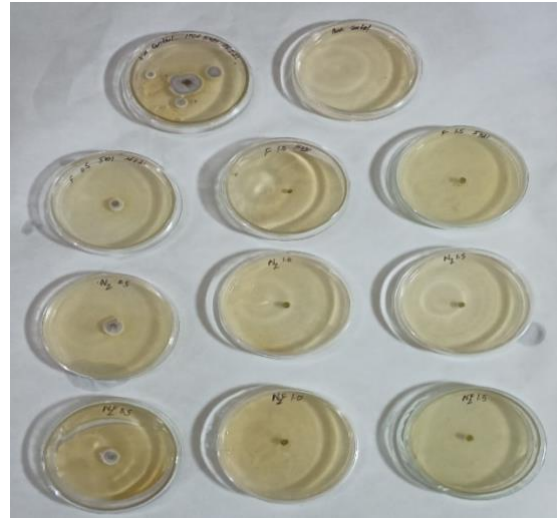

(b)

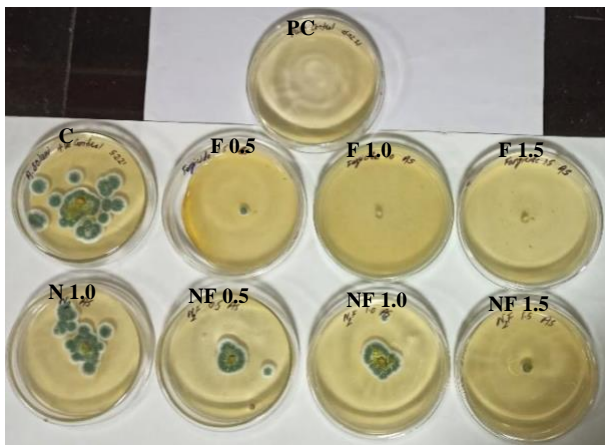

(c)

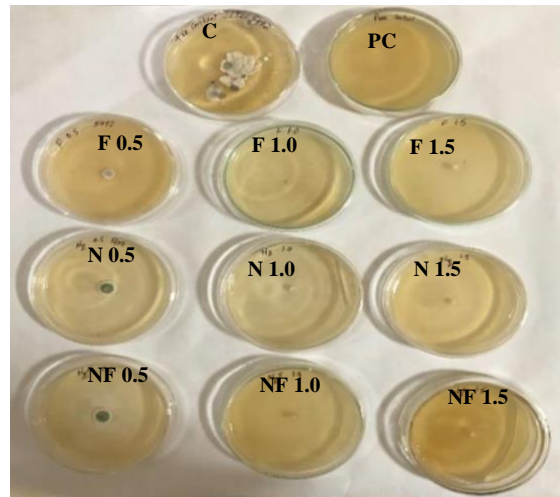

(d)

**Figure S1.** *In vitro* antifungal efficacy of blank, and fungicide (1.0 mg/ml) loaded CSCRG NPs at three concentrations (0.5, 1.0 and 1.5 ppm) using mycelium inhibition method against pathogens of tomato (a) *A. alternata* (b) *S. lycopersici*; and potato (c) *A. solani* (d) *Sclerotinia sclerotiorum*; where: PC-pure control (Petri plates with PDA alone), C-control, F-commercial fungicide, N-blank CSCRG NPs, NF-fungicide loaded CSCRG NPs having 1.0 mg/ml of mancozeb.

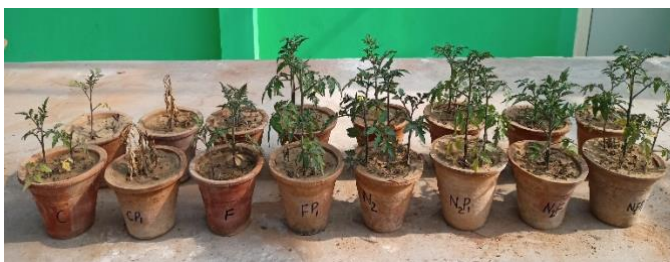

(a)

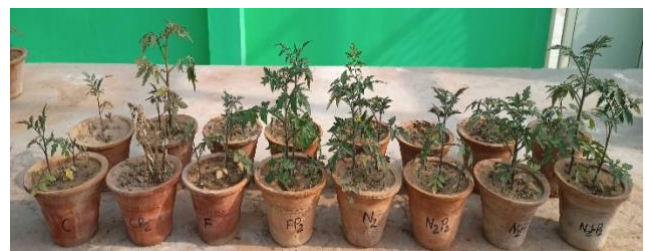

(b)

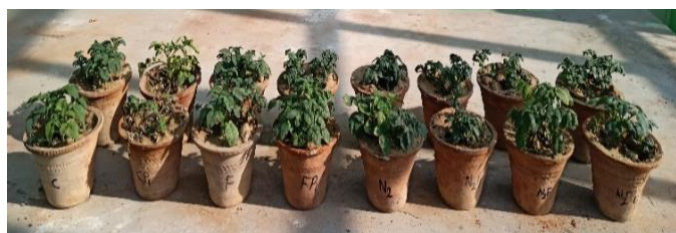

(c)

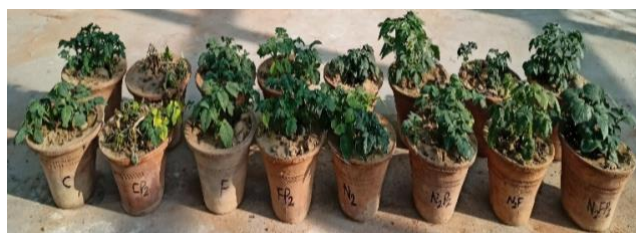

(d)

**Figure S2.** Treatment effects of CSCRG NPs on disease efficacy (pot conditions); in tomato plants (a) early blight and (b) leaf spot; in potato plants (c) early blight (d) stem rot.
